# Supplementary material
Source: publisher site journal article supplement (https://www.spandidos-publications.com/801/downloadSupplementary)
Supplement: Supplementary file 1 [file downloadSupplementary]

Table SI. Downregulated differentially expressed genes identified in lung adenocarcinomas.

| Gene symbol   | Gene name                                                                                           |
|---------------|-----------------------------------------------------------------------------------------------------|
| HEG1          | Heart development protein with EGF like domains 1                                                   |
| LIMS2         | LIM zinc finger domain containing 2                                                                 |
| GRK5          | G protein-coupled receptor kinase 5                                                                 |
| TNXB///TNXA   | Tenascin XB///tenascin XA (pseudogene)                                                              |
| OLFML1        | Olfactomedin like 1                                                                                 |
| HSPA12B       | Heat shock protein family A (Hsp70) member 12B                                                      |
| CYYR1         | Cysteine and tyrosine rich 1                                                                        |
| CCDC102B      | Coiled-coil domain containing 102B                                                                  |
| DOK6          | Docking protein 6                                                                                   |
| GIMAP1        | GTPase, IMAP family member 1                                                                        |
| LIMCH1        | LIM and calponin homology domains 1                                                                 |
| NEBL          | Nebulette                                                                                           |
| WWC2///CLDN22 | WW and C2 domain containing 2///claudin 22                                                          |
| DACH1         | Dachshund family transcription factor 1                                                             |
| PTPN21        | Protein tyrosine phosphatase, non-receptor type 21                                                  |
| SYNM          | Synemin                                                                                             |
| SLC39A8       | Solute carrier family 39 member 8                                                                   |
| RECK          | Reversion inducing cysteine rich protein with kazal motifs                                          |
| EMP2          | Epithelial membrane protein 2                                                                       |
| AFAP1L1       | Actin filament associated protein 1 like 1                                                          |
| NEXN          | Nexilin F-actin binding protein                                                                     |
| ITM2A         | Integral membrane protein 2A                                                                        |
| SMAD6         | SMAD family member 6                                                                                |
| LAMP3         | Lysosomal associated membrane protein 3                                                             |
| GNLY          | Granulysin                                                                                          |
| QKI           | QKI, KH domain containing RNA binding                                                               |
| PKNOX2        | PBX/knotted 1 homeobox 2                                                                            |
| FPR2          | Formyl peptide receptor 2                                                                           |
| SH2D3C        | SH2 domain containing 3C                                                                            |
| SH3GL3        | SH3 domain containing GRB2 like 3, endophilin A3                                                    |
| SHANK3        | SH3 and multiple ankyrin repeat domains 3                                                           |
| ECSCR         | Endothelial cell surface expressed chemotaxis and apoptosis regulator                               |
| TMEM204       | Transmembrane protein 204                                                                           |
| TRHDE         | Thyrotropin releasing hormone degrading enzyme                                                      |
| KIAA1462      | KIAA1462                                                                                            |
| ITIH5         | Inter-alpha-trypsin inhibitor heavy chain family member 5                                           |
| PCDH9         | Protocadherin 9                                                                                     |
| FGFR4         | Fibroblast growth factor receptor 4                                                                 |
| CLEC14A       | C-type lectin domain family 14 member A                                                             |
| CD93          | CD93 molecule                                                                                       |
| STARD13       | StAR related lipid transfer domain containing 13                                                    |
| MMRN2         | Multimerin 2                                                                                        |
| SLC5A9        | Solute carrier family 5 member 9                                                                    |
| TBX3          | T-box 3                                                                                             |
| CLEC1A        | C-type lectin domain family 1 member A                                                              |
| SMAD9         | SMAD family member 9                                                                                |
| JAM2          | Junctional adhesion molecule 2                                                                      |
| P2RY1         | Purinergic receptor P2Y1                                                                            |
| ANGPTL1       | Angiopoietin like 1                                                                                 |
| CSRNP1        | Cysteine and serine rich nuclear protein 1                                                          |
| ATOH8         | Atonal bHLH transcription factor 8                                                                  |
| VGLL3         | Vestigial like family member 3                                                                      |
| CCBE1         | Collagen and calcium binding EGF domains 1                                                          |
| ERG           | ERG, ETS transcription factor                                                                       |
| PPP1R14A      | Protein phosphatase 1 regulatory inhibitor subunit 14A                                              |
| AKAP12        | A-kinase anchoring protein 12                                                                       |
| NEDD4L        | Neural precursor cell expressed, developmentally down-regulated 4-like, E3 ubiquitin protein ligase |
| TTN           | Titin                                                                                               |

Table SI. Continued.

| Gene symbol                        | Gene name                                                                                                                                                  |
|------------------------------------|------------------------------------------------------------------------------------------------------------------------------------------------------------|
| THBD                               | Thrombomodulin                                                                                                                                             |
| NOSTRIN                            | Nitric oxide synthase trafficking                                                                                                                          |
| FEZ1                               | fasciculation and elongation protein zeta 1                                                                                                                |
| FENDRR                             | FOXF1 adjacent non-coding developmental regulatory RNA                                                                                                     |
| FAM189A2                           | Family with sequence similarity 189 member A2                                                                                                              |
| AOX1                               | Aldehyde oxidase 1                                                                                                                                         |
| PEAR1                              | Platelet endothelial aggregation receptor 1                                                                                                                |
| FAM46B                             | Family with sequence similarity 46 member B                                                                                                                |
| EPAS1                              | Endothelial PAS domain protein 1                                                                                                                           |
| ACE                                | Angiotensin I converting enzyme                                                                                                                            |
| GUCY1A2                            | Guanylate cyclase 1 soluble subunit alpha 2                                                                                                                |
| ITGA8                              | Integrin subunit alpha 8                                                                                                                                   |
| CCM2L                              | CCM2 like scaffolding protein                                                                                                                              |
| EML1                               | Echinoderm microtubule associated protein like 1                                                                                                           |
| NTNG1                              | Netrin G1                                                                                                                                                  |
| FXYD1                              | FXYD domain containing ion transport regulator 1                                                                                                           |
| LOC101060604///SLC7A5P2///SLC7A5P1 | Putative L-type amino acid transporter 1-like protein IMAA///solute carrier family 7 member 5 pseudogene 2///solute carrier family 7 member 5 pseudogene 1 |
| ADGRL3                             | Adhesion G protein-coupled receptor L3                                                                                                                     |
| TIE1                               | Tyrosine kinase with immunoglobulin like and EGF like domains 1                                                                                            |
| DLC1                               | DLC1 Rho GTPase activating protein                                                                                                                         |
| LINC00312                          | Long intergenic non-protein coding RNA 312                                                                                                                 |
| ITGA1                              | Integrin subunit alpha 1                                                                                                                                   |
| HIGD1B                             | HIG1 hypoxia inducible domain family member 1B                                                                                                             |
| ST6GALNAC5                         | ST6 N-acetylgalactosaminide alpha-2,6-sialyltransferase 5                                                                                                  |
| MASP1                              | Mannan binding lectin serine peptidase 1                                                                                                                   |
| PALM2-AKAP2///AKAP2                | PALM2-AKAP2 readthrough///A-kinase anchoring protein 2                                                                                                     |
| TBX5-AS1                           | TBX5 antisense RNA 1                                                                                                                                       |
| FRMD3                              | FERM domain containing 3                                                                                                                                   |
| APOLD1                             | Apolipoprotein L domain containing 1                                                                                                                       |
| TOX2                               | TOX high mobility group box family member 2                                                                                                                |
| SOX17                              | SRY-box 17                                                                                                                                                 |
| NKG7                               | Natural killer cell granule protein 7                                                                                                                      |
| WISP2                              | WNT1 inducible signaling pathway protein 2                                                                                                                 |
| LIFR                               | Leukemia inhibitory factor receptor alpha                                                                                                                  |
| SCN7A                              | Sodium voltage-gated channel alpha subunit 7                                                                                                               |
| SEMA5A                             | Semaphorin 5A                                                                                                                                              |
| PCAT19                             | Prostate cancer associated transcript 19 (non-protein coding)                                                                                              |
| GPR146                             | G protein-coupled receptor 146                                                                                                                             |
| NDRG4                              | NDRG family member 4                                                                                                                                       |
| RAMP2                              | Receptor activity modifying protein 2                                                                                                                      |
| CRYAB                              | Crystallin alpha B                                                                                                                                         |
| SVEP1                              | Sushi, von Willebrand factor type A, EGF and pentraxin domain containing 1                                                                                 |
| SEMA6A                             | Semaphorin 6A                                                                                                                                              |
| CAV2                               | Caveolin 2                                                                                                                                                 |
| NPNT                               | Nephronectin                                                                                                                                               |
| KLRF1                              | Killer cell lectin like receptor F1                                                                                                                        |
| SRPX                               | Sushi repeat containing protein, X-linked                                                                                                                  |
| ADARB1                             | Adenosine deaminase, RNA specific B1                                                                                                                       |
| RHOJ                               | Ras homolog family member J                                                                                                                                |
| TMEM178A                           | Transmembrane protein 178A                                                                                                                                 |
| GIMAP6                             | GTPase, IMAP family member 6                                                                                                                               |
| NRN1                               | Neuritin 1                                                                                                                                                 |
| PECAM1                             | Platelet and endothelial cell adhesion molecule 1                                                                                                          |
| RASIP1                             | Ras interacting protein 1                                                                                                                                  |
| TMTC1                              | Transmembrane and tetratricopeptide repeat containing 1                                                                                                    |
| MYCT1                              | Myc target 1                                                                                                                                               |
| VWF                                | von Willebrand factor                                                                                                                                      |

Table SI. Continued.

| Gene symbol         | Gene name                                                 |
|---------------------|-----------------------------------------------------------|
| DNASE1L3            | Deoxyribonuclease 1 like 3                                |
| SLC19A3             | Solute carrier family 19 member 3                         |
| ANXA8L1///ANXA8     | Annexin A8-like 1///annexin A8                            |
| ABI3BP              | ABI family member 3 binding protein                       |
| FGF2                | Fibroblast growth factor 2                                |
| PDE5A               | Phosphodiesterase 5A                                      |
| S1PR1               | Sphingosine-1-phosphate receptor 1                        |
| RXFP1               | Relaxin/insulin like family peptide receptor 1            |
| LEPROT///LEPR       | Leptin receptor overlapping transcript///leptin receptor  |
| SOCS2               | Suppressor of cytokine signaling 2                        |
| SLIT2               | Slit guidance ligand 2                                    |
| PLAC9               | Placenta specific 9                                       |
| EMCN                | Endomucin                                                 |
| ADAMTS1             | ADAM metallopeptidase with thrombospondin type 1 motif 1  |
| FAM162B             | Family with sequence similarity 162 member B              |
| CALCRL              | Calcitonin receptor like receptor                         |
| PIP5K1B             | Phosphatidylinositol-4-phosphate 5-kinase type 1 beta     |
| PGM5                | Phosphoglucomutase 5                                      |
| STX11               | Syntaxin 11                                               |
| ARHGEF26            | Rho guanine nucleotide exchange factor 26                 |
| ANGPT1              | Angiopoietin 1                                            |
| ACVRL1              | Activin A receptor like type 1                            |
| SEMA6D              | Semaphorin 6D                                             |
| VIPR1               | Vasoactive intestinal peptide receptor 1                  |
| BTNL9               | Butyrophilin like 9                                       |
| ASPA                | Aspartoacylase                                            |
| HBA2///HBA1         | Hemoglobin subunit alpha 2///hemoglobin subunit alpha 1   |
| AOC3                | Amine oxidase, copper containing 3                        |
| FHL5                | Four and a half LIM domains 5                             |
| CFD                 | Complement factor D                                       |
| RAMP3               | Receptor (G protein-coupled) activity modifying protein 3 |
| ADGRL2              | Adhesion G protein-coupled receptor L2                    |
| LOC100653057///CES1 | Liver carboxylesterase 1-like///carboxylesterase 1        |
| PTPRB               | Protein tyrosine phosphatase, receptor type B             |
| RNF182              | Ring finger protein 182                                   |
| HBB                 | Hemoglobin subunit beta                                   |
| GHR                 | Growth hormone receptor                                   |
| BDNF                | Brain derived neurotrophic factor                         |
| MARCO               | Macrophage receptor with collagenous structure            |
| MFAP4               | Microfibrillar associated protein 4                       |
| TGFBR3              | Transforming growth factor beta receptor 3                |
| LPL                 | Lipoprotein lipase                                        |
| AGTR1               | Angiotensin II receptor type 1                            |
| ARHGAP6             | Rho GTPase activating protein 6                           |
| CDH5                | Cadherin 5                                                |
| CXCR2               | C-X-C motif chemokine receptor 2                          |
| CDH19               | Cadherin 19                                               |
| KANK3               | KN motif and ankyrin repeat domains 3                     |
| LDB2                | LIM domain binding 2                                      |
| TCF21               | Transcription factor 21                                   |
| KCNT2               | Potassium sodium-activated channel subfamily T member 2   |
| GNG11               | G protein subunit gamma 11                                |
| FMO2                | Flavin containing monooxygenase 2                         |
| RGCC                | Regulator of cell cycle                                   |
| DPP6                | Dipeptidyl peptidase like 6                               |
| GIMAP8              | GTPase, IMAP family member 8                              |
| GPM6B               | Glycoprotein M6B                                          |
| CLIC5               | Chloride intracellular channel 5                          |
| FAT3                | FAT atypical cadherin 3                                   |

Table SI. Continued.

| Gene symbol | Gene name                                                                        |
|-------------|----------------------------------------------------------------------------------|
| KL          | Klotho                                                                           |
| KLF4        | Kruppel like factor 4                                                            |
| SGCG        | Sarcoglycan gamma                                                                |
| SPOCK2      | Sparc/osteonectin, cwcv and kazal-like domains proteoglycan (testican) 2         |
| CLDN5       | Claudin 5                                                                        |
| ADRA1A      | Adrenoceptor alpha 1A                                                            |
| ACADL       | Acyl-CoA dehydrogenase, long chain                                               |
| ANOS1       | Anosmin 1                                                                        |
| SCN4B       | Sodium voltage-gated channel beta subunit 4                                      |
| SPTBN1      | Spectrin beta, non-erythrocytic 1                                                |
| TAL1        | TAL bHLH transcription factor 1, erythroid differentiation factor                |
| MME         | Membrane metallo-endopeptidase                                                   |
| GDF10       | Growth differentiation factor 10                                                 |
| PCOLCE2     | Procollagen C-endopeptidase enhancer 2                                           |
| SEMA3G      | Semaphorin 3G                                                                    |
| ROBO4       | Roundabout guidance receptor 4                                                   |
| KCNK3       | Potassium two pore domain channel subfamily K member 3                           |
| LRRN3       | Leucine rich repeat neuronal 3                                                   |
| STXBP6      | Syntaxin binding protein 6                                                       |
| CD300LG     | CD300 molecule like family member g                                              |
| FIBIN       | Fin bud initiation factor homolog (zebrafish)                                    |
| SOX7        | SRY-box 7                                                                        |
| MS4A15      | Membrane spanning 4-domains A15                                                  |
| FHL1        | Four and a half LIM domains 1                                                    |
| IGSF10      | Immunoglobulin superfamily member 10                                             |
| ABCA8       | ATP binding cassette subfamily A member 8                                        |
| CCDC85A     | Coiled-coil domain containing 85A                                                |
| ANKRD29     | Ankyrin repeat domain 29                                                         |
| ADAMTS8     | ADAM metallopeptidase with thrombospondin type 1 motif 8                         |
| GRIA1       | Glutamate ionotropic receptor AMPA type subunit 1                                |
| ADH1B       | Alcohol dehydrogenase 1B (class I), beta polypeptide                             |
| ADAMTSL3    | ADAMTS like 3                                                                    |
| TEK         | TEK receptor tyrosine kinase                                                     |
| CAV1        | Caveolin 1                                                                       |
| LIN7A       | Lin-7 homolog A, crumbs cell polarity complex component                          |
| FAM107A     | Family with sequence similarity 107 member A                                     |
| GPIHBP1     | Glycosylphosphatidylinositol anchored high density lipoprotein binding protein 1 |
| CDO1        | Cysteine dioxygenase type 1                                                      |
| LINC00968   | Long intergenic non-protein coding RNA 968                                       |
| FOXF1       | Forkhead box F1                                                                  |
| AFF3        | AF4/FMR2 family member 3                                                         |
| COL6A6      | Collagen type VI alpha 6 chain                                                   |
| FGFBP2      | Fibroblast growth factor binding protein 2                                       |
| PDK4        | Pyruvate dehydrogenase kinase 4                                                  |
| MAMDC2      | MAM domain containing 2                                                          |
| ADIRF       | Adipogenesis regulatory factor                                                   |
| MYZAP       | Myocardial zonula adherens protein                                               |
| SERTM1      | Serine rich and transmembrane domain containing 1                                |
| PPBP        | Pro-platelet basic protein                                                       |
| SLC6A4      | Solute carrier family 6 member 4                                                 |
| CA4         | Carbonic anhydrase 4                                                             |
| LYVE1       | Lymphatic vessel endothelial hyaluronan receptor 1                               |
| BCHE        | Butyrylcholinesterase                                                            |
| SDPR        | Serum deprivation response                                                       |
| FAM150B     | Family with sequence similarity 150 member B                                     |
| MCEMP1      | Mast cell expressed membrane protein 1                                           |
| ADRB1       | Adrenoceptor beta 1                                                              |
| EDNRB       | Endothelin receptor type B                                                       |

Table SI. Continued.

| Gene symbol     | Gene name                                                    |
|-----------------|--------------------------------------------------------------|
| PIR-FIGF///FIGF | PIR-FIGF readthrough///c-fos induced growth factor           |
| IL6             | Interleukin 6                                                |
| CD36            | CD36 molecule                                                |
| TNNC1           | Troponin C1, slow skeletal and cardiac type                  |
| EXOSC7///CLEC3B | Exosome component 7///C-type lectin domain family 3 member B |
| NCKAP5          | NCK associated protein 5                                     |
| MT1M            | Metallothionein 1M                                           |
| RTKN2           | Rhotekin 2                                                   |
| FABP4           | Fatty acid binding protein 4                                 |
| CLDN18          | Claudin 18                                                   |
| GPM6A           | Glycoprotein M6A                                             |
| SOSTDC1         | Sclerostin domain containing 1                               |
| AGER            | Advanced glycosylation end-product specific receptor         |
| TMEM100         | Transmembrane protein 100                                    |
| FCN3            | Ficolin 3                                                    |

Table SII. Upregulated differentially expressed genes identified in lung adenocarcinomas.

| Gene symbol           | Gene name                                                                               |
|-----------------------|-----------------------------------------------------------------------------------------|
| SPP1                  | Secreted phosphoprotein 1                                                               |
| COL10A1               | Collagen type X alpha 1 chain                                                           |
| HS6ST2                | Heparan sulfate 6-O-sulfotransferase 2                                                  |
| TOX3                  | TOX high mobility group box family member 3                                             |
| TOP2A                 | Topoisomerase (DNA) II alpha                                                            |
| CP                    | Ceruloplasmin (ferroxidase)                                                             |
| CST1                  | Cystatin SN                                                                             |
| AFAP1-AS1             | AFAP1 antisense RNA 1                                                                   |
| CTHRC1                | Collagen triple helix repeat containing 1                                               |
| ANLN                  | Anillin actin binding protein                                                           |
| COMP                  | Cartilage oligomeric matrix protein                                                     |
| PROM2                 | Prominin 2                                                                              |
| ABCC3                 | ATP binding cassette subfamily C member 3                                               |
| CD24                  | CD24 molecule                                                                           |
| GCNT3                 | Glucosaminyl (N-acetyl) transferase 3, mucin type                                       |
| LRRC31                | Leucine rich repeat containing 31                                                       |
| RRM2                  | Ribonucleotide reductase regulatory subunit M2                                          |
| XDH                   | Xanthine dehydrogenase                                                                  |
| LINC00673///LINC00511 | Long intergenic non-protein coding RNA 673///long intergenic non-protein coding RNA 511 |
| ST6GALNAC1            | ST6 N-acetylgalactosaminide alpha-2,6-sialyltransferase 1                               |
| UHRF1                 | Ubiquitin like with PHD and ring finger domains 1                                       |
| KIAA0101              | KIAA0101                                                                                |
| PLPP2                 | Phospholipid phosphatase 2                                                              |
| PSAT1                 | Phosphoserine aminotransferase 1                                                        |
| C1orf53               | Chromosome 1 open reading frame 53                                                      |
| GOLM1                 | Golgi membrane protein 1                                                                |
| FUT2                  | Fucosyltransferase 2                                                                    |
| KIF20A                | Kinesin family member 20A                                                               |
| HMMR                  | Hyaluronan mediated motility receptor                                                   |
| UNC5CL                | Unc-5 family C-terminal like                                                            |
| UBE2T                 | Ubiquitin conjugating enzyme E2 T                                                       |
| AGR2                  | Anterior gradient 2, protein disulphide isomerase family member                         |
| OCIAD2                | OCIA domain containing 2                                                                |
| ZWINT                 | ZW10 interacting kinetochore protein                                                    |
| LGR4                  | Leucine rich repeat containing G protein-coupled receptor 4                             |
| SRD5A1                | Steroid 5 alpha-reductase 1                                                             |
| CENPF                 | Centromere protein F                                                                    |
| KIF26B                | Kinesin family member 26B                                                               |
| BUB1                  | BUB1 mitotic checkpoint serine/threonine kinase                                         |
| C1orf106              | Chromosome 1 open reading frame 106                                                     |
| CDH3                  | Cadherin 3                                                                              |
| WFDC2                 | WAP four-disulfide core domain 2                                                        |
| HMGB3                 | High mobility group box 3                                                               |
| NUSAP1                | Nucleolar and spindle associated protein 1                                              |
| KCNK5                 | Potassium two pore domain channel subfamily K member 5                                  |
| FERMT1                | Fermitin family member 1                                                                |
| ETV4                  | ETS variant 4                                                                           |
| BLACAT1               | Bladder cancer associated transcript 1 (non-protein coding)                             |
| EFNA4                 | Ephrin A4                                                                               |
| HKDC1                 | Hexokinase domain containing 1                                                          |
| BCL2L15               | BCL2 like 15                                                                            |
| EPHX3                 | Epoxide hydrolase 3                                                                     |
| F2RL1                 | F2R like trypsin receptor 1                                                             |
| TMEM45B               | Transmembrane protein 45B                                                               |
| MANEAL                | Mannosidase endo-alpha like                                                             |
| SLC22A18              | Solute carrier family 22 member 18                                                      |
